# Supplementary material for: Molecular surveillance of insecticide resistance in Phlebotomus argentipes targeted by indoor residual spraying for visceral leishmaniasis elimination in India
Source: PubMed Central journal article supplement (PMC10659200; doi:10.1371/journal.pntd.0011734), 2023-11-08
Supplement: pntd.0011734.s005.pdf [file pntd.0011734.s005.pdf]

# PLOS Neglected Tropical Diseases

## Molecular surveillance of insecticide resistance in *Phlebotomus argentipes* targeted by indoor residual spraying for visceral leishmaniasis elimination in India --Manuscript Draft--

|                                                                                                                                                                                                                                                                                                                                                                                                                                    |                                                                                                                                                                                                                                                                                                                                                                                                                                                                                                                                                                                                                                                                                                                                                                                                                                                                                                                                                                                                                                                                                                                                                                                                                                                                                                                                                                                                                                                                                                                                                                                                                                                                                                                                                                                                                                                                                                                                                                                                                                                                                                                                                                                                                                                                   |
|------------------------------------------------------------------------------------------------------------------------------------------------------------------------------------------------------------------------------------------------------------------------------------------------------------------------------------------------------------------------------------------------------------------------------------|-------------------------------------------------------------------------------------------------------------------------------------------------------------------------------------------------------------------------------------------------------------------------------------------------------------------------------------------------------------------------------------------------------------------------------------------------------------------------------------------------------------------------------------------------------------------------------------------------------------------------------------------------------------------------------------------------------------------------------------------------------------------------------------------------------------------------------------------------------------------------------------------------------------------------------------------------------------------------------------------------------------------------------------------------------------------------------------------------------------------------------------------------------------------------------------------------------------------------------------------------------------------------------------------------------------------------------------------------------------------------------------------------------------------------------------------------------------------------------------------------------------------------------------------------------------------------------------------------------------------------------------------------------------------------------------------------------------------------------------------------------------------------------------------------------------------------------------------------------------------------------------------------------------------------------------------------------------------------------------------------------------------------------------------------------------------------------------------------------------------------------------------------------------------------------------------------------------------------------------------------------------------|
| <b>Manuscript Number:</b>                                                                                                                                                                                                                                                                                                                                                                                                          | PNTD-D-23-00186                                                                                                                                                                                                                                                                                                                                                                                                                                                                                                                                                                                                                                                                                                                                                                                                                                                                                                                                                                                                                                                                                                                                                                                                                                                                                                                                                                                                                                                                                                                                                                                                                                                                                                                                                                                                                                                                                                                                                                                                                                                                                                                                                                                                                                                   |
| <b>Full Title:</b>                                                                                                                                                                                                                                                                                                                                                                                                                 | Molecular surveillance of insecticide resistance in <i>Phlebotomus argentipes</i> targeted by indoor residual spraying for visceral leishmaniasis elimination in India                                                                                                                                                                                                                                                                                                                                                                                                                                                                                                                                                                                                                                                                                                                                                                                                                                                                                                                                                                                                                                                                                                                                                                                                                                                                                                                                                                                                                                                                                                                                                                                                                                                                                                                                                                                                                                                                                                                                                                                                                                                                                            |
| <b>Short Title:</b>                                                                                                                                                                                                                                                                                                                                                                                                                | Molecular resistance surveillance in Indian <i>Phlebotomus argentipes</i>                                                                                                                                                                                                                                                                                                                                                                                                                                                                                                                                                                                                                                                                                                                                                                                                                                                                                                                                                                                                                                                                                                                                                                                                                                                                                                                                                                                                                                                                                                                                                                                                                                                                                                                                                                                                                                                                                                                                                                                                                                                                                                                                                                                         |
| <b>Article Type:</b>                                                                                                                                                                                                                                                                                                                                                                                                               | Research Article                                                                                                                                                                                                                                                                                                                                                                                                                                                                                                                                                                                                                                                                                                                                                                                                                                                                                                                                                                                                                                                                                                                                                                                                                                                                                                                                                                                                                                                                                                                                                                                                                                                                                                                                                                                                                                                                                                                                                                                                                                                                                                                                                                                                                                                  |
| <b>Keywords:</b>                                                                                                                                                                                                                                                                                                                                                                                                                   | insecticide resistance, Molecular surveillance, KDR, <i>Phlebotomus argentipes</i>                                                                                                                                                                                                                                                                                                                                                                                                                                                                                                                                                                                                                                                                                                                                                                                                                                                                                                                                                                                                                                                                                                                                                                                                                                                                                                                                                                                                                                                                                                                                                                                                                                                                                                                                                                                                                                                                                                                                                                                                                                                                                                                                                                                |
| <b>Abstract:</b>                                                                                                                                                                                                                                                                                                                                                                                                                   | <p>Molecular surveillance of resistance is an increasingly important part of vector borne disease control programmes that utilise insecticides. The visceral leishmaniasis (VL) elimination programme in India uses indoor residual spraying (IRS) with the pyrethroid, alpha-cypermethrin to control <i>Phlebotomus argentipes</i> the vector of <i>Leishmania donovani</i>, the causative agent of VL. Prior long-term use of DDT may have selected for knockdown resistance (kdr) mutants (1014F and S) at the shared DDT and pyrethroid target site, which are common in India and can also cause pyrethroid cross-resistance. We monitored the frequency of these marker mutations over five years from 2017-2021 in sentinel sites in eight districts of north-east India covered by IRS. Frequencies varied markedly among the districts, though finer scale variation, among villages within districts, was limited. A pronounced and highly significant increase in resistance-associated genotypes occurred between 2017 and 2018, but with relative stability thereafter, and some reversion toward more susceptible genotypes in 2021. Analyses linked IRS with mutant frequencies suggesting an advantage to more resistant genotypes, especially when pyrethroid was under-sprayed in IRS. However, this advantage did not translate into sustained allele frequency changes over the study period, potentially because of a relatively greater net advantage under field conditions for a wild-type/mutant genotype than projected from laboratory studies and/or high costs of the most resistant genotype. Further work is required to improve calibration of each 1014 genotype with resistance, preferably using operationally relevant measures. The lack of change in resistance mechanism over the span of the study period, coupled with available bioassay data suggesting susceptibility, suggests that resistance has yet to emerge despite intensive IRS. Nevertheless, the advantage of resistance-associated genotypes with IRS and under spraying, suggest that measures to continue monitoring and improvement of spray quality are vital, and consideration of future alternatives to pyrethroids for IRS would be advisable.</p> |
| <b>Additional Information:</b>                                                                                                                                                                                                                                                                                                                                                                                                     |                                                                                                                                                                                                                                                                                                                                                                                                                                                                                                                                                                                                                                                                                                                                                                                                                                                                                                                                                                                                                                                                                                                                                                                                                                                                                                                                                                                                                                                                                                                                                                                                                                                                                                                                                                                                                                                                                                                                                                                                                                                                                                                                                                                                                                                                   |
| <b>Question</b>                                                                                                                                                                                                                                                                                                                                                                                                                    | <b>Response</b>                                                                                                                                                                                                                                                                                                                                                                                                                                                                                                                                                                                                                                                                                                                                                                                                                                                                                                                                                                                                                                                                                                                                                                                                                                                                                                                                                                                                                                                                                                                                                                                                                                                                                                                                                                                                                                                                                                                                                                                                                                                                                                                                                                                                                                                   |
| <p><b>Government Employee</b></p> <p>Are you or any of the contributing authors an employee of the United States government?</p> <p>Manuscripts authored by one or more US Government employees are not copyrighted, but are licensed under a <a href="#">CC0 Public Domain Dedication</a>, which allows unlimited distribution and reuse of the article for any lawful purpose. This is a legal requirement for US Government</p> | <p>No - No authors are employees of the U.S. government.</p>                                                                                                                                                                                                                                                                                                                                                                                                                                                                                                                                                                                                                                                                                                                                                                                                                                                                                                                                                                                                                                                                                                                                                                                                                                                                                                                                                                                                                                                                                                                                                                                                                                                                                                                                                                                                                                                                                                                                                                                                                                                                                                                                                                                                      |

|                                                                                                                                                                                                                                                                                                                                                                                                                                                                                                 |                                                                                                                                                                                                                                                                                                                  |
|-------------------------------------------------------------------------------------------------------------------------------------------------------------------------------------------------------------------------------------------------------------------------------------------------------------------------------------------------------------------------------------------------------------------------------------------------------------------------------------------------|------------------------------------------------------------------------------------------------------------------------------------------------------------------------------------------------------------------------------------------------------------------------------------------------------------------|
| <p>employees.</p> <p>This will be typeset if the manuscript is accepted for publication.</p>                                                                                                                                                                                                                                                                                                                                                                                                    |                                                                                                                                                                                                                                                                                                                  |
| <p><b>Financial Disclosure</b></p> <p>Enter a financial disclosure statement that describes the sources of funding for the work included in this submission and the role the funder(s) played. This includes grants and any commercial funding of the work or authors.</p> <p>This statement will be typeset if the manuscript is accepted for publication.</p> <p>Review the <a href="#">submission guidelines</a> and the instructions link below for detailed requirements and guidance.</p> | <p>This work was supported in whole by the Bill &amp; Melinda Gates Foundation OPP1151797 to MC. Under the grant conditions of the Foundation, a Creative Commons Attribution 4.0 Generic License has already been assigned to the Author Accepted Manuscript version that might arise from this submission.</p> |
| <p><b>Competing Interests</b></p> <p>On behalf of all authors, disclose any competing interests that could be perceived to bias this work.</p> <p>This statement will be typeset if the manuscript is accepted for publication.</p> <p>Review the instructions link below and PLOS NTDs' <a href="#">competing interests</a> policy to determine what information must be disclosed at submission.</p>                                                                                          | <p>The authors have declared that no competing interests exist.</p>                                                                                                                                                                                                                                              |
| <p><b>Data Availability</b></p> <p>Provide a <b>Data Availability Statement</b> in the box below. This statement should detail where the data used in this submission can be accessed. This statement will be typeset if the manuscript is accepted for publication.</p> <p>Before publication, authors are required to</p>                                                                                                                                                                     | <p>Data is contained in the manuscript and supporting files.</p>                                                                                                                                                                                                                                                 |

make all data underlying their findings fully available, without restriction. Review our [PLOS Data Policy](#) page for detailed information on this policy. Instructions for writing your Data Availability statement can be accessed via the Instructions link below.

1 Title: **Molecular surveillance of insecticide resistance in *Phlebotomus argentipes* targeted by**  
2 **indoor residual spraying for visceral leishmaniasis elimination in India**

3

4 Short title: Molecular resistance surveillance in Indian *Phlebotomus argentipes*

5

6 Emma Reid<sup>1#</sup>, Rinki Deb<sup>1#</sup>, Asgar Ali<sup>2</sup>, Rudra Pratap Singh<sup>1</sup>, Prabhas Kumar Mishara<sup>1</sup>, Josie Shepherd<sup>1</sup>,  
7 Anand Mohan Singh<sup>2</sup>, Aakanksha Bharti<sup>2</sup>, Chandramani Singh,<sup>3</sup> Sadhana Sharma<sup>3</sup>, Michael  
8 Coleman<sup>1\$\*</sup> and David Weetman<sup>1\$</sup>

9

10 #, \$ Joint authors, \* Corresponding author

11

12 1. Liverpool School of Tropical Medicine, Liverpool, United Kingdom.

13 2. CARE India, Patna, India.

14 3. All India Institute of Medical Sciences, Patna, India.

15

16

## 17 **Abstract**

18

19 Molecular surveillance of resistance is an increasingly important part of vector borne disease control  
20 programmes that utilise insecticides. The visceral leishmaniasis (VL) elimination programme in India  
21 uses indoor residual spraying (IRS) with the pyrethroid, alpha-cypermethrin to control *Phlebotomus*

22 *argentipes* the vector of *Leishmania donovani*, the causative agent of VL. Prior long-term use of DDT  
23 may have selected for knockdown resistance (*kdr*) mutants (1014F and S) at the shared DDT and  
24 pyrethroid target site, which are common in India and can also cause pyrethroid cross-resistance.  
25 We monitored the frequency of these marker mutations over five years from 2017-2021 in sentinel  
26 sites in eight districts of north-east India covered by IRS. Frequencies varied markedly among the  
27 districts, though finer scale variation, among villages within districts, was limited. A pronounced and  
28 highly significant increase in resistance-associated genotypes occurred between 2017 and 2018, but  
29 with relative stability thereafter, and some reversion toward more susceptible genotypes in 2021.  
30 Analyses linked IRS with mutant frequencies suggesting an advantage to more resistant genotypes,  
31 especially when pyrethroid was under-sprayed in IRS. However, this advantage did not translate into  
32 sustained allele frequency changes over the study period, potentially because of a relatively greater  
33 net advantage under field conditions for a wild-type/mutant genotype than projected from  
34 laboratory studies and/or high costs of the most resistant genotype. Further work is required to  
35 improve calibration of each 1014 genotype with resistance, preferably using operationally relevant  
36 measures. The lack of change in resistance mechanism over the span of the study period, coupled  
37 with available bioassay data suggesting susceptibility, suggests that resistance has yet to emerge  
38 despite intensive IRS. Nevertheless, the advantage of resistance-associated genotypes with IRS and  
39 under spraying, suggest that measures to continue monitoring and improvement of spray quality are  
40 vital, and consideration of future alternatives to pyrethroids for IRS would be advisable.

41

## 42 **Author summary**

43

44 Visceral leishmaniasis (VL) is a deadly parasitic disease with a primary focus in north-eastern India.  
45 Control of the sand fly, *Phlebotomus argentipes*, vector of VL in India, is primarily reliant upon  
46 spraying the internal walls of houses and animal shelters with residual pyrethroid insecticide. Spray  
47 programmes depend upon well-controlled spraying and effective insecticides to which the targeted  
48 insects are susceptible. Changing insecticides is logistically challenging, therefore early detection of  
49 insecticide resistance is crucial. As part of a wider programme of entomological surveillance we used  
50 molecular resistance assays of knockdown resistance (*kdr*) mutations to investigate evidence for  
51 changing resistance profiles, and possible links with the spraying programme across a system of  
52 eight districts in north-eastern India. Mutant frequencies varied substantially in space and time, with  
53 a major change across the first two years of the study, but stability for the remainder. Resistance-  
54 associated *kdr* alleles were positively associated with indices of spray coverage and with under  
55 spraying, suggesting that this creates vulnerability to development of pyrethroid resistance.  
56 However, the most strongly resistance conferring mutant genotype was rarely detected, suggesting  
57 overall that notable resistance is not yet emerging, despite wide coverage of the spray programme.  
58 This is an encouraging result for the VL elimination programme but with apparent advantage of  
59 resistance alleles in sprayed areas it would be wise to seek alternative insecticides for spraying.

60

61

## 62 **Introduction**

63 Between 2004 to 2010 there were an estimated 200,000 to 400,000 cases and 50,000 deaths  
64 annually of visceral leishmaniasis (VL), also known as Kala-azar, making this the second deadliest  
65 parasite after malaria. Currently 130 million people in India from four states, Bihar, Jharkhand, Uttar  
66 Pradesh and West Bengal are at risk from VL, however, only 3145 cases were recorded in 2019 in

67 India reflecting the success of the elimination programme [1]. In India VL is caused by the parasite  
68 *Leishmania donovani*, transmitted solely by the sand fly *Phlebotomus argentipes*.

69 Vector-based control of VL was originally a by-product of IRS campaigns using  
70 dichlorodiphenyltrichloroethane (DDT) from the National Malaria Eradication Programme in the  
71 1960s and 1970s. However, with reduction of anti-malaria IRS campaigns in the 1970s VL cases  
72 began to rise again [2, 3]. In 2005, a tripartite agreement between Bangladesh, India, and Nepal was  
73 signed with the aim of eliminating VL and post-kala-azar dermal leishmaniasis as a public health  
74 problem *i.e.* to less than one case per 10,000 population by 2015, this was extended to 2020 [4], and  
75 recently extended to 2030 due to effects of the Covid-19 pandemic. India is on target to achieve  
76 elimination as rates of VL decline and are currently at their lowest ever levels [5]. Current measures  
77 employed in the VL elimination efforts in India include early case detection with effective treatment,  
78 surveillance, and vector control with IRS. Historically DDT was used for IRS, and was used initially in  
79 the elimination campaign from 2005, however prompted in part by resistance in local *P. argentipes*  
80 populations to DDT [6] a change was made in 2015 and 2016 to spraying with the pyrethroid alpha-  
81 cypermethrin.

82 DDT and pyrethroids share the same mode of action, both binding to the voltage gated sodium  
83 channel (Vgsc) resulting in repetitive nerve firing, paralysis and death of the insect [7, 8]. Multiple  
84 mutations in the Vgsc gene cause DDT and pyrethroid 'knockdown resistance' (*kdr*) in insects, the  
85 most common occurring at codon 1014 (using *Musca domestica* codon numbering [9] Partial  
86 sequencing of the Vgsc in *P. argentipes* from Bihar detected two *kdr* mutations, which change the  
87 wild-type, insecticide susceptible leucine allele at codon 1014 to either phenylalanine (L1014F) via  
88 either of two nucleotide changes, or serine (L1014S) [8]. Both amino acid mutations were  
89 significantly elevated in first-lab-generation (F1) female *P. argentipes* surviving exposure in tube  
90 bioassays using *Anopheles* diagnostic doses of DDT or reduced duration assays of alpha-

91 cypermethrin and deltamethrin. Though 1014F confers somewhat stronger DDT-resistance and  
92 pyrethroid-tolerance than 1014S, two mutant copies (FF, FS or SS) appeared to be required for a  
93 resistant phenotype in most cases, giving a pragmatic binary separation into *kdr* and non-*kdr*  
94 genotypes, which displayed strong predictive value as resistance markers [8]. Other studies have  
95 also established an association between *P. argentipes* survivorship in pyrethroid bioassays in the  
96 laboratory [10, 11], though possession of *kdr* mutations does not necessarily equate to survival [12].

97

98 Unlike for DDT, potentially operationally relevant pyrethroid resistance has yet to be detected in *P.*  
99 *argentipes* [13] but monitoring for signals of changes in resistance is an essential part of control  
100 programmes. Owing to their lab-intractability arising from a relatively prolonged life cycle and  
101 sensitivity to rearing conditions, broad-scale phenotypic assessment of insecticide resistance is  
102 challenging in *P. argentipes*. In addition, approved diagnostic doses to detect deviation from  
103 susceptibility have only just become available for sand flies [14]. In contrast, molecular surveillance  
104 using sensitive and specific DNA assays targeting the L1014F and S *kdr* mutations provide a high-  
105 throughput tool for spatial and temporal monitoring to detect changes indicative of shifting  
106 resistance profiles. Whilst the 1014F and S mutations alone may not lead to high level pyrethroid  
107 resistance, experience from African *Anopheles* shows how prolonged pyrethroid exposure in wild  
108 populations leads to accumulation of supplementary *kdr* mutations [15], as well as addition of  
109 metabolic resistance mutants [16]. Moreover, though IRS spraying quality in Bihar has improved  
110 markedly, variation inevitably remains [13], which *P. argentipes* possessing resistance mechanisms  
111 may be able to exploit.

112



113 We report results from wide-scale spatio-temporal molecular surveillance of *kdr* mutations in *P.*  
114 *argentipes* sampled from sentinel sites spanning the most VL-endemic areas of north-eastern India.  
115 The primary aims of the study were to determine whether changes in resistance marker frequency  
116 have occurred during the period of intensive alpha-cypermethrin spraying, and whether any  
117 variation might be linked to, or represent a future risk for, the IRS programme. Whilst a marked shift  
118 in *kdr* genotypes and mutant alleles was seen across multiple sentinel sites between the first and  
119 second years of sampling (2017-18), frequencies thereafter remained stable to 2021. This stability  
120 indicates that, despite evidence linking IRS activities to advantages for resistant genotypes, overall  
121 IRS does not currently appear to be selecting for enhanced resistance across.

122

## 123 **Methods**

### 124 **Sentinel sites**

125 Eight sentinel sites in VL endemic areas were established in North-Eastern India: six in Bihar, one in  
126 Jharkhand and one in West Bengal as described previously [13]. The districts are Champaran,  
127 Darjeeling, East, Godda, Gopalganj, Katihar, Muzzafapur, Purnia and Samastipur (Fig. 1). In brief,  
128 each site had at least 1 new VL case per 10,000 persons per year at sub-district (block) level. Block  
129 selection was based on total reported VL case numbers, extracted from the 2015 district level IRS  
130 micro-plan data. Villages were selected if they had a VL case history for the previous three  
131 consecutive years, appropriate infrastructure to allow year-round village access. Of the villages that  
132 met the selection criteria, between four and seven villages per sentinel site were selected using a  
133 random number generator in Microsoft Excel.

134

135 Fig. 1. Map displaying location of districts (modified from ref 13)

136

137 ***Phlebotomus argentipes* collections**

138 Year-round sand fly collections with CDC light traps were made from 15 randomly selected houses in  
139 each village within the eight districts over a period of two consecutive nights (6:00 PM to 6:00 AM)  
140 every two weeks [13] from 2017 to 2021. The light traps were hung in the corner of a bedroom and  
141 optimally positioned 15 cm away from the wall and 5 cm above ground. All sand flies were identified  
142 to species level by morphological criteria from established taxonomic keys [17] and *P. argentipes*  
143 stored in 1.5ml Eppendorf tubes over silica for further analysis.

144

145 ***Kdr* marker genotyping**

146 DNA was extracted from female sand flies using STE buffer with proteinase K by heating on a  
147 thermocycler for 60 minutes at 65°C then 15 minutes at 95°C. Using a maximum number of five  
148 females per household, samples were randomly selected for each district. DNA was used as template  
149 for genotyping to detect *kdr* mutations *Vgsc1014S* and *Vgsc1014F* [8]. Two Taqman qPCRs were used  
150 to determine genotype, using TaqMan Gene Expression Master Mix and specific primers and probes  
151 (Thermofisher life sciences) developed by [8], following the same assay protocol. Thermal cycling  
152 conditions were as follows; 95°C for 3 minutes followed by 40 cycles of 95°C for 10 seconds and 55°C  
153 for 30 seconds, results were analysed using CFX Maestro Software (Bio-Rad) and MxPro – Mx3005P).

154

155 **IRS coverage and quality**

156 Details of assessment of IRS coverage and quality assessment using HPLC are described in detail  
157 elsewhere [13]. For the analysis here we used the proportion of villages that were sprayed within

158 10km of a village from which sand flies were collected as an index of local spray coverage, and  
159 averaged results from the spray rounds in years where more than one occurred. For an index of  
160 spray quality, we used the proportion of houses sampled within a village determined to be under  
161 sprayed based on the classification in [13].

162

### 163 **Data analysis**

164 Genotypes were scored according to their amino acids, and additionally according to whether the  
165 genotype might be predicted to lead to a knockdown resistance phenotype, assuming a recessive  
166 nature of the mutants [8]. Thus, individuals possessing two mutant alleles, whether S/S, S/F or F/F at  
167 position 1014 are considered '*kdr* genotypes', whilst those with either two wild type leucine alleles  
168 or heterozygotes (L/S or L/F) are considered non-*kdr* genotypes. Data were analysed using  
169 generalised linear models with a binomial logit link function in Stata 16, with village level analyses  
170 including district (=sentinel site) as a random effect to account for clustering. Mean changes in  
171 genotype or allele frequency from the first collection year were compared to starting frequencies at  
172 village and district levels using Spearman rank correlation in SPSS v26. Two analyses were performed  
173 to determine possible influences of IRS on genotype and allele frequencies. (i) Data from 2018-2020  
174 (excluding Darjeeling which lacked IRS data), were analysed using GLMs including district and year as  
175 before, but also including an index of alpha-cypermethrin spraying coverage (above) from the  
176 preceding year, and the proportion of houses determined to be under-sprayed (above) as covariates.  
177 Analysis was limited to 2018-2020 owing to availability of both IRS coverage and HPLC data for the  
178 years 2017-2019. (ii) Data from 2017 were compared between IRS and non-IRS villages within  
179 districts, with district included as a random variable in the GLM. This analysis was only possible for  
180 2017 because in subsequent years data from IRS and non-IRS villages were not available from within  
181 districts.

182

## 183 **Results**

184

### 185 **Spatial and temporal variation in marker frequency**

186 A total of 17,680 sand flies collected from 46 villages within the eight districts between 2017 and  
187 2021 were successfully genotyped at the *Vgsc* 1014 locus. Results for the *kdr* genotype classification  
188 (i.e. genotypes with two mutant 1014 alleles) are illustrated in Fig. 2; substantial variation among  
189 districts and collection years is evident, with each highly significant ( $P < 0.001$  for both district and  
190 year; Table 1). The major change in *kdr* genotype frequency occurred between 2017 and 2018 with  
191 stable frequency to 2020 and then a reduction in 2021 (Fig. 2), though frequencies remained  
192 significantly higher than in 2017 (Table 1). This temporal change in frequency from 2017 was  
193 significant in five of the eight districts (Table 2). Spatial variation among villages within districts was  
194 non-significant in most cases though evident among villages in Godda and Darjeeling (Table 2). In the  
195 latter, the spatial variation, combined with relatively small sample sizes may have obscured  
196 statistical detection of an apparent temporal pattern of change (Fig. 2). There was a significant trend  
197 (Spearman's  $\rho = -0.66$ ,  $N=33$ ,  $P < 0.001$ ) for villages with lower *kdr* frequencies in 2017 to show a  
198 higher increase over subsequent years (Fig. 3). Though this analysis did not account for clustering of  
199 villages, the pattern was also significant across districts when pooling village-level data (Spearman's  
200  $\rho = -0.80$ ,  $N=8$ ,  $P=0.018$ ).

201

202 Fig. 2. *kdr* genotype frequencies (mean +/- 95% confidence intervals) across the 5-year period for the 8  
203 districts

204 Fig. 3. Relationship between *kdr* genotype frequency in the first sampling year and average changes from the  
 205 initial value over subsequent sampling years at the village level. Dashed line showing linear regression fit is  
 206 provided for visual illustration of trend.

207

208

209

210 **Table 1. GLM (binomial) analysis of predictors of *kdr* genotype frequency**

211

| Source                 | odds ratio | 95% lower C.I. | 95% upper C.I. | P-value |
|------------------------|------------|----------------|----------------|---------|
| Intercept              | 2.716      | 2.337          | 3.156          |         |
| <i>District</i>        |            |                |                |         |
| Darjeeling             | 0.037      | 0.030          | 0.045          | <0.001  |
| East Champaran         | 0.067      | 0.057          | 0.079          | <0.001  |
| Godda                  | 0.114      | 0.098          | 0.133          | <0.001  |
| Gopalganj              | 0.698      | 0.586          | 0.832          | <0.001  |
| Katihar                | 0.074      | 0.062          | 0.089          | <0.001  |
| Muzaffarpur            | 0.505      | 0.431          | 0.592          | <0.001  |
| Purnia                 | 0.175      | 0.148          | 0.207          | <0.001  |
| Samastipur (reference) |            |                |                |         |

| <i>Year</i>      |       |       |       |        |
|------------------|-------|-------|-------|--------|
| 2017 (reference) |       |       |       |        |
| 2018             | 2.127 | 1.915 | 2.363 | <0.001 |
| 2019             | 2.040 | 1.846 | 2.254 | <0.001 |
| 2020             | 2.116 | 1.868 | 2.398 | <0.001 |
| 2021             | 1.539 | 1.361 | 1.741 | <0.001 |

212

213 **Table 2. Summary of GLM results showing P-values for effects of village and year within each**  
214 **district on *kdr* genotype variation**

215

| <i>District</i> | Village | Year   | Pairwise differences   |
|-----------------|---------|--------|------------------------|
| Darjeeling      | <0.001  | NS     |                        |
| East Champaran  | NS      | <0.001 | 2017<others            |
| Godda           | <0.001  | <0.001 | 2017<others            |
| Gopalganj       | NS      | <0.001 | 2017<others            |
| Katihar         | NS      | <0.001 | 2017<others            |
| Muzaffarpur     | NS      | <0.001 | 2017<2018; 2021<others |
| Purnia          | NS      | NS     |                        |

|            |    |    |  |
|------------|----|----|--|
| Samastipur | NS | NS |  |
|------------|----|----|--|

216

217 Temporal variation in the frequency of the three 1014 alleles reflected that of the *kdr* genotype,  
 218 albeit in opposing direction for wild type leucine, with the same sharp change from 2017 to 2018  
 219 and stability thereafter. In 2021 whilst phenylalanine remained stable, the serine allele decreased in  
 220 frequency and the leucine allele decreased relative to the 2017 starting point (S1 Table). The pattern  
 221 of spatial variation among districts in the leucine allele was also very similar (again in opposing  
 222 direction) to that observed for *kdr* genotypes. Spatial variation of the two resistant alleles was more  
 223 variable, with the phenylalanine and serine interchanging in frequency between relatively higher or  
 224 lower levels (S1 Table) yielding parity in *kdr* genotypes (Table 1). Overall frequencies of each allele  
 225 were remarkably balanced (L:S:F = 32%:37%:31%) with relatively little variation in proportions  
 226 between the start and end point of the five years of collections (Fig. 4). Major changes in frequencies  
 227 of all but the serine homozygote (S/S) genotype occurred between 2017 and 2018, followed by  
 228 stability over the subsequent years, with reductions in frequency of S/S and an increase in the wild  
 229 type homozygote L/L in 2021, relative to 2017 (Fig. 5).

230

231 Figure 4 - Map comparisons of 2017 data and 2021 data showing the 1014 alleles.

232 Figure 5. Genotype proportions for the 1014 marker in each sampling year. Comparison with the 2017  
 233 reference year is indicated by the +/-/= signs in 2018 (see S1 Table for statistical test results); subsequent years  
 234 show the same relationship with 2017 unless indicated by a different symbol.

235 **Association of IRS with 1014 marker variation**

236 To investigate whether IRS might influence spatial and temporal variation in 1014 genotypes and  
 237 allele frequencies we performed two analyses which aimed to test the hypothesis that insecticide

238 pressure from IRS may favour certain alleles or genotypes. The first analysis involved a GLM  
 239 including district and year as factors (as in Table 1 above) but additionally included two covariates:  
 240 the proportion of houses in surrounding villages covered by alpha-cypermethrin IRS and the  
 241 proportion of houses classified as under sprayed by HPLC, each in the year preceding the sample  
 242 collection. The model was limited to marker data from 2018-2020 for which both the preceding  
 243 year's spray coverage and HPLC data were available. This analysis followed the reasoning that given  
 244 available evidence for mutants' association with pyrethroid tolerance, rather than necessarily full  
 245 resistance (see Introduction), selection could be influenced by both coverage and substandard  
 246 dosing. The second analysis examined marker frequency differences between villages receiving IRS  
 247 or not from within the same districts and was limited to 2017 for which such pairings within districts  
 248 were available. Results are summarised in Table 3a with odds ratios greater than one indicating a  
 249 positive relationship between genotype or allele frequency in a sampling year and proportionate IRS  
 250 coverage in the preceding year; odds ratios less than one indicate a negative relationship.

251

252 **Table 3. Summary of GLM results (odds ratios and P-values) for: (a) effects of IRS coverage with**  
 253 **alpha-cypermethrin in the previous year, with proportion of HPLC results indicating**  
 254 **underspraying; (b) comparison of IRS vs non-IRS villages in 2017, on marker frequencies**

255

|                           | (a) IRS coverage |         | (a) IRS underspraying |         | (b) IRS vs not (2017) |         |
|---------------------------|------------------|---------|-----------------------|---------|-----------------------|---------|
| <i>genotype or allele</i> | Odds ratio       | P-value | Odds ratio            | P-value | Odds ratio            | P-value |
| <i>kdr</i>                | 1.49             | 0.003   | 1.13                  | 0.20    | 0.99                  | 0.92    |



|    |      |        |      |       |      |        |
|----|------|--------|------|-------|------|--------|
| LL | 0.37 | <0.001 | 0.56 | 0.004 | 0.65 | 0.43   |
| LS | 0.35 | <0.001 | 0.56 | 0.001 | 0.78 | 0.05   |
| LF | 1.30 | 0.08   | 1.28 | 0.026 | 1.70 | 0.019  |
| SS | 1.09 | 0.58   | 1.15 | 0.30  | 0.79 | 0.16   |
| FS | 1.62 | <0.001 | 0.91 | 0.38  | 3.09 | 0.30   |
| FF | 0.72 | 0.40   | 1.93 | 0.013 | 0.72 | 0.77   |
| L  | 0.69 | <0.001 | 0.86 | 0.042 | 0.9  | 0.26   |
| S  | 1.04 | 0.63   | 0.95 | 0.52  | 0.83 | <0.001 |
| F  | 1.40 | <0.001 | 1.16 | 0.048 | 1.36 | <0.001 |

models: (a) District, Year, proportionate SP-IRS in previous year, proportion of houses undersprayed; (b): IRS applied (yes/no) district (random variable).

256

257 Relationships between IRS coverage and marker frequencies broadly followed *a priori* expectations  
258 for resistance association. Frequencies of the leucine allele and two of the three leucine-containing  
259 genotypes (LL and LS) were significantly negative, with LF positive but not significant. Frequencies of  
260 the phenylalanine allele, the FS genotype and the *kdr* genotype group were significantly positively  
261 related to IRS coverage (Table 3a). Proportionate IRS under spraying showed similar effects on the  
262 frequencies of the leucine allele and genotypes, though here the positive association of LF frequency  
263 was significant (i.e., higher with under spraying). Phenylalanine allele and homozygote genotype

264 frequencies were significantly positively related to IRS under spraying, whilst neither the *kdr*  
265 genotype group nor FS genotype were significantly associated (Table 3a). More limited data from the  
266 2017 IRS vs no-IRS village comparison also support a link with the LF genotype and phenylalanine  
267 allele, each of which was significantly more common in IRS villages, as well as detection of a lower  
268 frequency of the serine allele, though again the *kdr* genotype group did not vary significantly (Table  
269 3b).

270

271 It should be noted that there was a strong correlation between alpha-cypermethrin-IRS coverage  
272 and previous DDT-IRS coverage in 2014-2016 (Figure S1) in the same groups of villages ( $r=0.48-0.70$ ,  
273  $N=43$ ,  $P\leq 0.001$  for each year between 2016 and 2020). Thus, whilst relationships between allele and  
274 genotype frequencies and alpha-cypermethrin-IRS pressure from the preceding year's coverage,  
275 might be consistent with relative advantage or disadvantage, an influence of older spraying coverage  
276 history cannot be discounted. Nevertheless, relationships with under spraying are also at least  
277 partially consistent with expectation of selection in combination with IRS pressure, in terms of  
278 negative relationships with the 'non-*kdr* genotypes' LL and LS, and a positive relationship with the  
279 *kdr*-linked genotype FF. However, for both results from under spraying and comparison of IRS and  
280 non-IRS villages, the significant positive relationship with LF (not expected to confer *kdr*) and lack of  
281 significance of the *kdr* genotype group do not meet *a priori* expectations.

282

283 To further investigate the relationship among genotypes and possible evidence for selection, Hardy-  
284 Weinberg (H-W) expectations were calculated for each district-year sample set (Fig. 6). The majority  
285 of tests showed significant deviation of observed genotypes from expectations (33/40  $P<0.05$ ,  
286 following Bonferroni multiple testing correction), indicating widespread departure from H-W.

287 Barring some exceptional, and relatively spatially variable results for SS and FS in 2017 (evident from  
288 high standard errors), the general pattern was of under-representation of LL, LS and FF genotypes,  
289 slight over-representation of SS and FS genotypes, and strong over-representation of the LF  
290 genotype. The latter is suggestive of a relative benefit of the LF genotype. Taken together with the  
291 results from the IRS-association analysis (Table 3) this may indicate a hitherto unexpected benefit of  
292 this wild-type/resistant allele heterozygote in the field populations surveyed when exposed to IRS.

293

294 Fig 6. Deviation of each 1014 genotype from Hardy-Weinberg expectations in each year of sampling (mean  
295 across districts +/- standard error). Overall average percentage frequencies of each genotype are shown above  
296 genotype labels.

297

## 298 **Discussion**

299

300 India is making significant progress toward elimination of visceral leishmaniasis, with IRS playing a  
301 crucial role in reducing seasonal *P. argentipes* populations [2, 13, 18]. Ensuring the continued  
302 efficacy of IRS is of great importance, both through monitoring of application spray rates and of  
303 warning signs for an impact of insecticide resistance in the targeted *P. argentipes* vector.  
304 Programmatic use of pyrethroids for IRS creates an inherent vulnerability to the threat of resistance,  
305 due to a shared target site with DDT, to which resistance has become well established [6, 8, 13].  
306 Resistance to alpha-cypermethrin, the pyrethroid used for IRS in India, has yet to be demonstrated  
307 and was not recorded in tests performed annually between 2016-2019 [13]. However, pyrethroid  
308 resistance measured using the same *Anopheles* bioassay thresholds, which are generally lower than  
309 for *P. argentipes* [19], has recently emerged in Nepal, especially to alpha-cypermethrin, and appears

310 to be more common in villages receiving IRS [20]. Though this might be linked to an earlier switch to  
311 pyrethroids in Nepal [20] than India, and operational impacts remain unclear, these results clearly  
312 highlight the need for vigilance. By monitoring frequencies of the 1014 *kdr* mutations across the  
313 sentinel site system in north-western India across a five-year period we sought evidence for changes  
314 which could provide early indication of changing resistance profiles.

315

316 Results showed a significant increase from an average of approximately 35% *kdr* genotype frequency  
317 (i.e. those possessing two mutant alleles) to approximately 50% between 2017 and 2018, but  
318 thereafter little evidence of further increase in subsequent years, and a slight decline in 2021. The  
319 increase from 2017 levels was significantly more pronounced in areas with lower starting *kdr*  
320 genotype frequencies, most notably in the districts of Godda and Katihar which showed over four-  
321 fold increases. Nevertheless, spatial variation – primarily evident among, rather than within districts  
322 was pronounced in 2017, and remained so across the five study years. Frequency of *kdr* showed an  
323 imperfect longitudinal pattern with eastern sample sites tending to be lower and the three high *kdr*  
324 sites, Gopalganj, Muzaffarpur, and Samastipur, more western, though the western site East  
325 Champaran exhibited relatively low *kdr*, precluding simple geographical interpretation of patterns.  
326 Relatively high *kdr* frequencies ( $\approx 60\%$  1014F and S alleles) have been reported previously in West  
327 Bengal [10]. Whilst like the overall average we detected, this is much higher than in our West Bengal  
328 site, Darjeeling, though Sardar et al.'s study also included additional more southern sample sites  
329 [10]. Very high frequencies of *kdr* mutants have also been recorded in Bangladesh, further  
330 challenging the idea of simple geographical patterns. Indeed, near fixation of *kdr* alleles in both *P.*  
331 *argentinae* and another phlebotomine *Sergentomyia babu babu* were found in Myrmensingh, which  
332 had received prolonged IRS treatment, with much lower frequency in Pabna district which has a  
333 much shorter history of IRS [21]The primary difference between sites was a much higher frequency

334 of the 1014F mutation in Myrmensingh [21], which contrasts with a fourfold lower frequency in  
335 collection made several years earlier from the same district [21].

336

337 Our results also provided evidence for links between IRS coverage, in terms of the proportion of  
338 houses sprayed or when comparing IRS and non-IRS villages (in 2017), as well as proportionate  
339 under spraying. An elevated frequency of the 1014F was consistently positively associated with IRS  
340 in each test, whilst association of specific genotypes varied. Association of 1014F is consistent with  
341 the results from Bangladesh above [21], but in our results this did not necessarily translate into high  
342 frequencies of the 1014FF homozygote genotype expected to cause the most resistant phenotype. In  
343 fact, this genotype was consistently under-represented in the dataset compared to Hardy-Weinberg  
344 expectations, with relative over-representation of 1014LF heterozygotes. Moreover, given the high  
345 IRS pressure, the stability of *kdr* alleles from 2018 onwards is not consistent with the advantage  
346 implied by the positive IRS-*kdr* associations translating into consistent selective pressure.

347

348 There are several possible explanations for this. (1) The positive associations reflect past history of  
349 spraying with DDT, prior to the study period, rather than contemporary patterns. This is possible for  
350 the coverage data, owing to a very strong correlation between alpha-cypermethrin spray coverage  
351 and prior DDT spray coverage, however, it is less likely to generate associations between *kdr* allele  
352 frequencies in IRS vs non-IRS villages in 2017, and does not link with evidence for under spraying. (2)  
353 The 1014F/F homozygote genotype confers substantial fitness costs. A study on different but nearby  
354 *kdr* mutants (S989P and V1016G) in *Ae. aegypti* [22] which backcrossed the mutants into an  
355 insecticide susceptible strain, and another of 1014F specifically in, which was introduced to a  
356 susceptible *An. gambiae* strain by genome editing [23] each documented strong fitness costs

357 affecting both larval and adult stages. Whilst a strong candidate, evidence from phlebotomines  
358 would be required to confirm this hypothesis. (3) The 1014LF heterozygote confers some resistance,  
359 perhaps balanced by a lower cost than 1014FF homozygotes. Laboratory data suggested that the  
360 1014F and S mutants were largely recessive, although of the heterozygote wildtype/mutant  
361 genotypes, data for 1014LF were the most ambiguous with relatively closer frequencies in survivors  
362 and dead in deltamethrin assays [8]. Further investigation is required to confirm a possible  
363 advantage of this genotype, which if selected would maintain balanced frequencies of resistant and  
364 wild type alleles. (4) IRS is not selecting as strongly for *kdr* in north-eastern India, either because of  
365 differences in the spray programme, local ecology, or in the *P. argentipes* population. Consistent  
366 with this is the observation that 1014F frequency rarely exceeded 40% in any site-year sample in our  
367 dataset, whereas in Myrmensingh 1014F frequency exceeded 70% [21]. Population differences might  
368 involve additional mutations or mechanisms found in Bangladesh which interact with 1014F to  
369 elevate resistance or reduce costs. Such secondary non-synonymous variants are common in the  
370 *Vgsc* of *An. gambiae* [15] and *Ae. aegypti* [24] and might also involve interaction with variants in  
371 other genes beyond the *Vgsc* [25, 26] To date *Vgsc* sequencing in *P. argentipes* that harbour any *kdr*  
372 mutations has been limited to a relatively short section flanking the 1014 codon, precluding current  
373 evaluation of this explanation.

374

375 Separating the above hypotheses will require additional studies, of which further association testing  
376 of different *Vgsc* 1014 genotypes would provide clarity on their association with resistance,  
377 preferably using more field-relevant assays, such as exposure to pyrethroid-sprayed surfaces [11].  
378 Studies on relative fitness costs of 1014FF homozygotes in relation to 1014FS heterozygotes would  
379 also give insight into their potential cost-benefit balance. Sequencing of the whole *Vgsc*, from Indian  
380 and Bangladeshi populations to explore the contrasting presence of additional mutants could be

381 especially valuable and could highlight additional markers for screening. In addition, exploration of  
382 additional resistance mechanisms, beyond the *Vgsc*, which have been documented via broad-  
383 spectrum biochemical assays in *P. argentipes* [12, 27] could inform of the sufficiency of *Vgsc*  
384 mutations to generate resistance phenotypes. Irrespective of the explanation, the positive  
385 associations we found between IRS and *kdr*, should serve as a cautionary note, especially for  
386 continued vigilance to maintain and improve spray quality, given the positive association between  
387 *kdr* and under spraying detected.

388

## 389 **Conclusion**

390

391 The overall results from the study are positive for the VL elimination programme, in that a significant  
392 increase in *kdr* resistance marker frequency from 2017 to 2018 did not continue, suggesting that  
393 further progress towards pyrethroid resistance did not occur during the 5-year monitoring period.  
394 However, there are warning signs that IRS links with relative advantage of certain genotypes which  
395 are more resistance-associated. Coupled with recent emergence of pyrethroid resistance in Nepal,  
396 this indicates that alternatives insecticides should be incorporated into an integrated resistance  
397 management strategy. The value of molecular surveillance for the VL programme will be improved  
398 by additional quantification of genotype-phenotype associations, preferably from more  
399 operationally relevant phenotypic monitoring, and investigation of additional resistance  
400 mechanisms.

401

## 402 **Supporting information**

403 S1 Table. Generalised linear model results for allele and genotype frequencies as predicted by  
404 district and year. (DOCX)

405 S2 Table. Marker genotyping data for each *P. argentipes* individual included in the study (XLSX)

406 S3 Table. Marker data summarised by village including spray proportion metrics (XLSX)

407 S1 Figure. Scatterplot illustrating relationships between alpha-cypermethrin-IRS coverage index each  
408 year and prior DDT-IRS coverage in the same groups of villages. A linear regression line is fitted  
409 based on a multi-year average of the alpha-cypermethrin-IRS data.

410

411

## 412 **Acknowledgments**

413 We thank the National Vector Borne Disease Control Programme for facilitating this work  
414 and the villages in which we have had the pleasure to work in.

415

416

## 417 **Author Contributions**

418 **Conceptualization: MC, RD**

419 **Data curation: ER, JS**

420 **Formal analysis: DW, JS**

421 **Funding acquisition: MC**

422 **Investigation: ER RD, AA, AMS, AB**



423 **Methodology: ER, DW**

424 **Project administration: RD, PKM, ROS**

425 **Resources: CS, SS**

426 **Supervision: MC, CS, SS, AA, PKM, RPS**

427 **Visualization: DW, ER**

428 **Writing – original draft: DW, ER**

429 **Writing – review & editing: All authors**

430

#### 431 **References**

432

433

- 434 1. Thakur CP, Thakur M. Accelerating kala-azar elimination in India. *Indian J Med Res.*  
435 2020;152(6):538-40. doi: 10.4103/ijmr.IJMR\_841\_19. PubMed PMID: 34145092; PubMed  
436 Central PMCID: PMCPMC8224153.
- 437 2. Joshi AB, Das ML, Akhter S, Chowdhury R, Mondal D, Kumar V, et al. Chemical and  
438 environmental vector control as a contribution to the elimination of visceral leishmaniasis  
439 on the Indian subcontinent: cluster randomized controlled trials in Bangladesh, India and  
440 Nepal. *BMC Medicine.* 2009;7(1):54. doi: 10.1186/1741-7015-7-54.
- 441 3. Deb RM, Stanton MC, Foster GM, Das Gupta RK, Roy N, Das P, et al. Visceral  
442 leishmaniasis cyclical trends in Bihar, India - implications for the elimination programme.  
443 *Gates Open Res.* 2018;2:10. Epub 20180221. doi: 10.12688/gatesopenres.12793.1. PubMed  
444 PMID: 30234191; PubMed Central PMCID: PMCPMC6139379.
- 445 4. Sundar S, Singh OP, Chakravarty J. Visceral leishmaniasis elimination targets in India,  
446 strategies for preventing resurgence. *Expert Rev Anti Infect Ther.* 2018;16(11):805-12. Epub  
447 20181010. doi: 10.1080/14787210.2018.1532790. PubMed PMID: 30289007; PubMed  
448 Central PMCID: PMCPMC6345646.
- 449 5. Priyamvada K, Bindroo J, Sharma MP, Chapman LAC, Dubey P, Mahapatra T, et al.  
450 Visceral leishmaniasis outbreaks in Bihar: community-level investigations in the context of

451 elimination of kala-azar as a public health problem. *Parasites & Vectors*. 2021;14(1):52. doi:  
452 10.1186/s13071-020-04551-y.

453 6. Coleman M, Foster GM, Deb R, Pratap Singh R, Ismail HM, Shivam P, et al. DDT-based  
454 indoor residual spraying suboptimal for visceral leishmaniasis elimination in India. *Proc Natl*  
455 *Acad Sci U S A*. 2015;112(28):8573-8. Epub 20150629. doi: 10.1073/pnas.1507782112.  
456 PubMed PMID: 26124110; PubMed Central PMCID: PMC4507214.

457 7. Davies TG, Field LM, Usherwood PN, Williamson MS. A comparative study of voltage-  
458 gated sodium channels in the Insecta: implications for pyrethroid resistance in Anopheline  
459 and other Neopteran species. *Insect Mol Biol*. 2007;16(3):361-75. Epub 20070413. doi:  
460 10.1111/j.1365-2583.2007.00733.x. PubMed PMID: 17433068.

461 8. Gomes B, Purkait B, Deb RM, Rama A, Singh RP, Foster GM, et al. Knockdown  
462 resistance mutations predict DDT resistance and pyrethroid tolerance in the visceral  
463 leishmaniasis vector *Phlebotomus argentipes*. *PLOS Neglected Tropical Diseases*.  
464 2017;11(4):e0005504. doi: 10.1371/journal.pntd.0005504.

465 9. Rinkevich FD, Du Y, Dong K. Diversity and convergence of sodium channel mutations  
466 involved in resistance to pyrethroids. *Pesticide Biochemistry and Physiology*.  
467 2013;106(3):93-100. doi: <https://doi.org/10.1016/j.pestbp.2013.02.007>.

468 10. Sardar AA, Saha P, Chatterjee M, Bera DK, Biswas P, Maji D, et al. Insecticide  
469 susceptibility status of *Phlebotomus argentipes* and polymorphisms in voltage-gated sodium  
470 channel (vgsc) gene in Kala-azar endemic areas of West Bengal, India. *Acta Tropica*.  
471 2018;185:285-93. doi: <https://doi.org/10.1016/j.actatropica.2018.06.005>.

472 11. Sarkar S, Kuroki A, #214, zbel Y, Osada Y, Omachi S, et al. First detection of voltage-  
473 gated sodium channel mutations in *Phlebotomus argentipes* collected from  
474 Bangladesh. *Journal of Vector Borne Diseases*. 2021;58(4):368-73. doi: 10.4103/0972-  
475 9062.328972.

476 12. Pathirage DRK, Karunaratne SHPP, Senanayake SC, Karunaweera ND. Insecticide  
477 susceptibility of the sand fly leishmaniasis vector *Phlebotomus argentipes* in Sri Lanka.  
478 *Parasites & Vectors*. 2020;13(1):246. doi: 10.1186/s13071-020-04117-y.

479 13. Deb R, Singh RP, Mishra PK, Hitchins L, Reid E, Barwa AM, et al. Impact of IRS: Four-  
480 years of entomological surveillance of the Indian Visceral Leishmaniasis elimination  
481 programme. *PLoS Negl Trop Dis*. 2021;15(8):e0009101. Epub 20210809. doi:  
482 10.1371/journal.pntd.0009101. PubMed PMID: 34370731; PubMed Central PMCID:  
483 PMC8376195.

484 14. World Health O. Guidelines for monitoring the durability of long-lasting insecticidal  
485 mosquito nets under operational conditions. Geneva: World Health Organization; 2011.

486 15. Clarkson CS, Miles A, Harding NJ, O'Reilly AO, Weetman D, Kwiatkowski D, et al. The  
487 genetic architecture of target-site resistance to pyrethroid insecticides in the African malaria  
488 vectors *Anopheles gambiae* and *Anopheles coluzzii*. *Mol Ecol*. 2021;30(21):5303-17. Epub  
489 20210308. doi: 10.1111/mec.15845. PubMed PMID: 33590926; PubMed Central PMCID:  
490 PMC9019111.

491 16. Njoroge H, van't Hof A, Oruni A, Pipini D, Nagi SC, Lynd A, et al. Identification of a  
492 rapidly-spreading triple mutant for high-level metabolic insecticide resistance in  
493 *Anopheles gambiae* provides a real-time molecular diagnostic for anti-malarial  
494 intervention deployment. *bioRxiv*. 2021:2021.02.11.429702. doi:  
495 10.1101/2021.02.11.429702.

- 496 17. Kalra NLB, Y.M. Manuals on Entomology in Visceral Leishmaniasis. New Delhi: 1988.
- 497 18. Sardar AA, Saha P, Maji D, Guha U, Maji AK, Guha SK. Impact of Indoor Residual  
498 Spray (IRS) of synthetic pyrethroid (alphacypermethrin) on sand fly population in the Kala-  
499 azar endemic areas of Malda district, West Bengal, India. International Journal of Tropical  
500 Insect Science. 2022;42(5):3293-302. doi: 10.1007/s42690-022-00830-6.
- 501 19. Determining discriminating concentrations of insecticides for monitoring resistance  
502 in sand flies: report of a multi-centre laboratory study and WHO expert consultations  
503 [Internet]. 2023; [62]
- 504 20. Roy L, Uranw S, Cloots K, Smekens T, Kiran U, Pyakurel UR, et al. Susceptibility status  
505 of the wild-caught *Phlebotomus argentipes* (Diptera: Psychodidae: Phlebotominae), the  
506 sand fly vector of visceral leishmaniasis, to different insecticides in Nepal. PLOS Neglected  
507 Tropical Diseases. 2022;16(7):e0010304. doi: 10.1371/journal.pntd.0010304.
- 508 21. Kuroki A, Itokawa K, Özbek Y, Komagata O, Osada Y, Omachi S, et al. The frequencies  
509 of knockdown resistance mutations in phlebotomine sandflies under different degrees of  
510 indoor residual spraying. 衛生動物. 2021;72(4):229-36. doi: 10.7601/mez.72.229.
- 511 22. Rigby LM, Rašić G, Peatey CL, Hugo LE, Beebe NW, Devine GJ. Identifying the fitness  
512 costs of a pyrethroid-resistant genotype in the major arboviral vector *Aedes aegypti*.  
513 Parasites & Vectors. 2020;13(1):358. doi: 10.1186/s13071-020-04238-4.
- 514 23. Grigoraki L, Cowlshaw R, Nolan T, Donnelly M, Lycett G, Ranson H. CRISPR/Cas9  
515 modified *An. gambiae* carrying *kdr* mutation L1014F functionally validate its contribution in  
516 insecticide resistance and combined effect with metabolic enzymes. PLOS Genetics.  
517 2021;17(7):e1009556. doi: 10.1371/journal.pgen.1009556.
- 518 24. Itokawa K, Sekizuka T, Maekawa Y, Yatsu K, Komagata O, Sugiura M, et al. High-  
519 throughput genotyping of a full voltage-gated sodium channel gene via genomic DNA using  
520 target capture sequencing and analytical pipeline MoNaS to discover novel insecticide  
521 resistance mutations. PLOS Neglected Tropical Diseases. 2019;13(11):e0007818. doi:  
522 10.1371/journal.pntd.0007818.
- 523 25. Campbell CL, Saavedra-Rodriguez K, Kubik TD, Lenhart A, Lozano-Fuentes S, Black  
524 WCIV. *Vgsc*-interacting proteins are genetically associated with pyrethroid resistance in  
525 *Aedes aegypti*. PLOS ONE. 2019;14(1):e0211497. doi: 10.1371/journal.pone.0211497.
- 526 26. Cosme LV, Lima JBP, Powell JR, Martins AJ. Genome-wide Association Study Reveals  
527 New Loci Associated With Pyrethroid Resistance in *Aedes aegypti*. Frontiers in Genetics.  
528 2022;13. doi: 10.3389/fgene.2022.867231.
- 529 27. Hassan F, Singh KP, Shivam P, Ali V, Dinesh DS. Amplification and Characterization of  
530 DDT Metabolizing Delta Class GST in Sand Fly, *Phlebotomus argentipes* (Diptera:  
531 Psychodidae) From Bihar, India. Journal of Medical Entomology. 2021;58(6):2349-57. doi:  
532 10.1093/jme/tjab124.

533

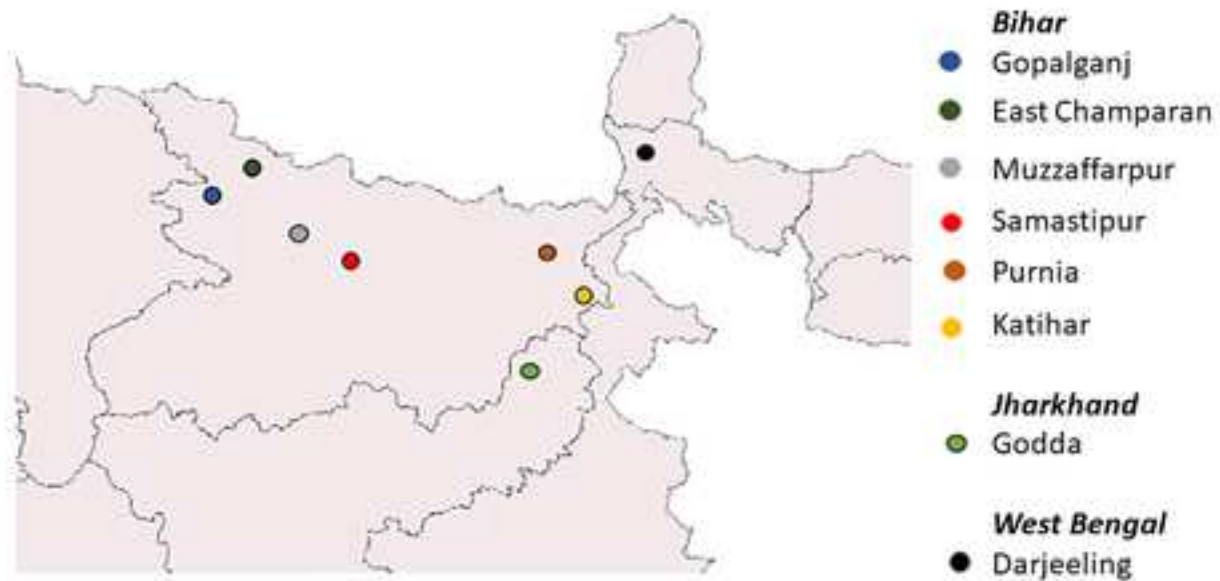

Figure 1-Map displaying location of districts (modified from ref 14)

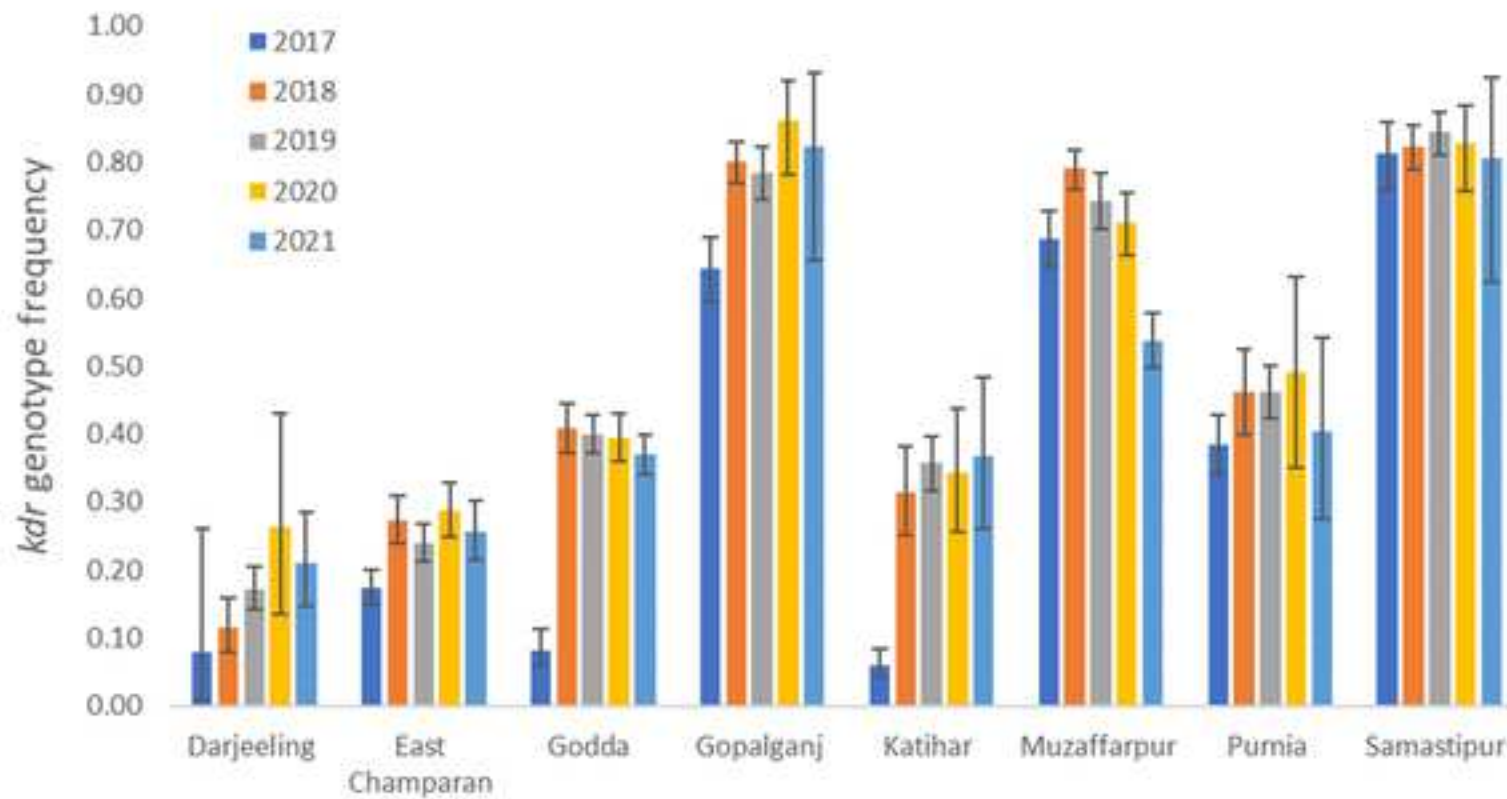

Figure 2 – *kdr* genotype frequencies (mean  $\pm$  95% confidence intervals) across the 5-year period for the 8 districts.

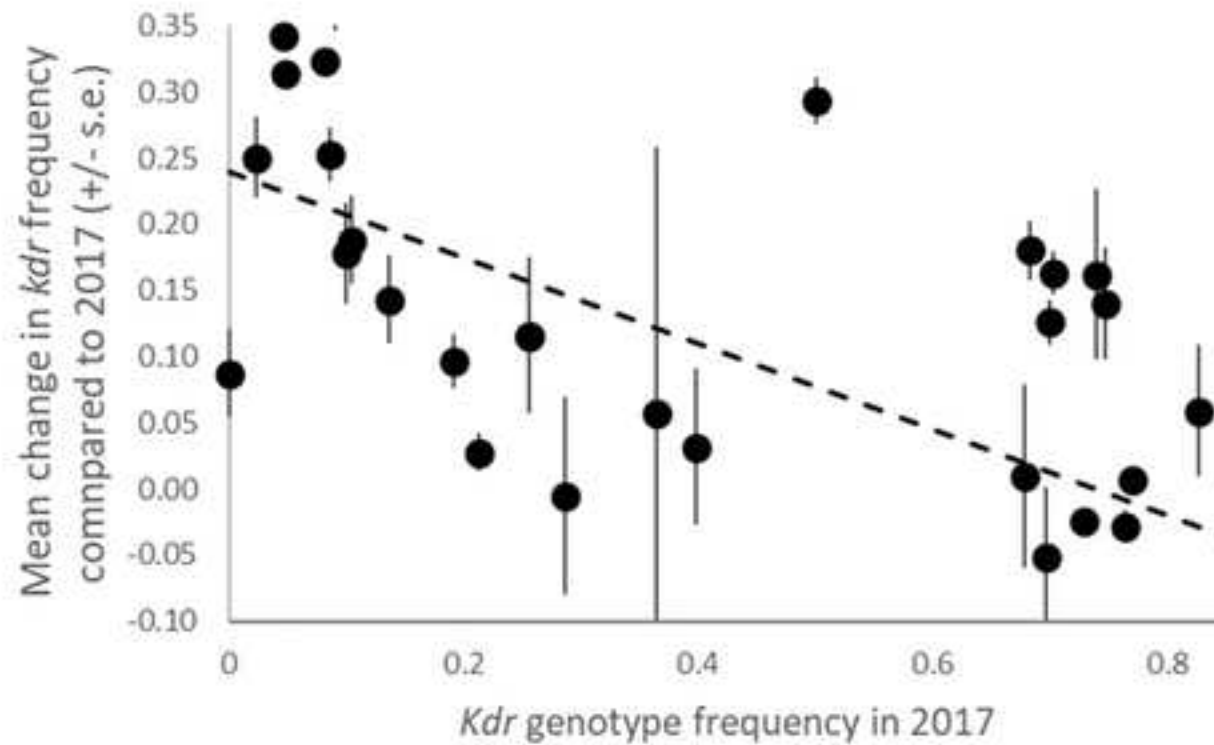

Figure 3 – Relationship between *kdr* genotype frequency in the first sampling year and average changes from the initial value over subsequent sampling years at the village level. Dashed line showing linear regression fit is provided for visual illustration of trend.

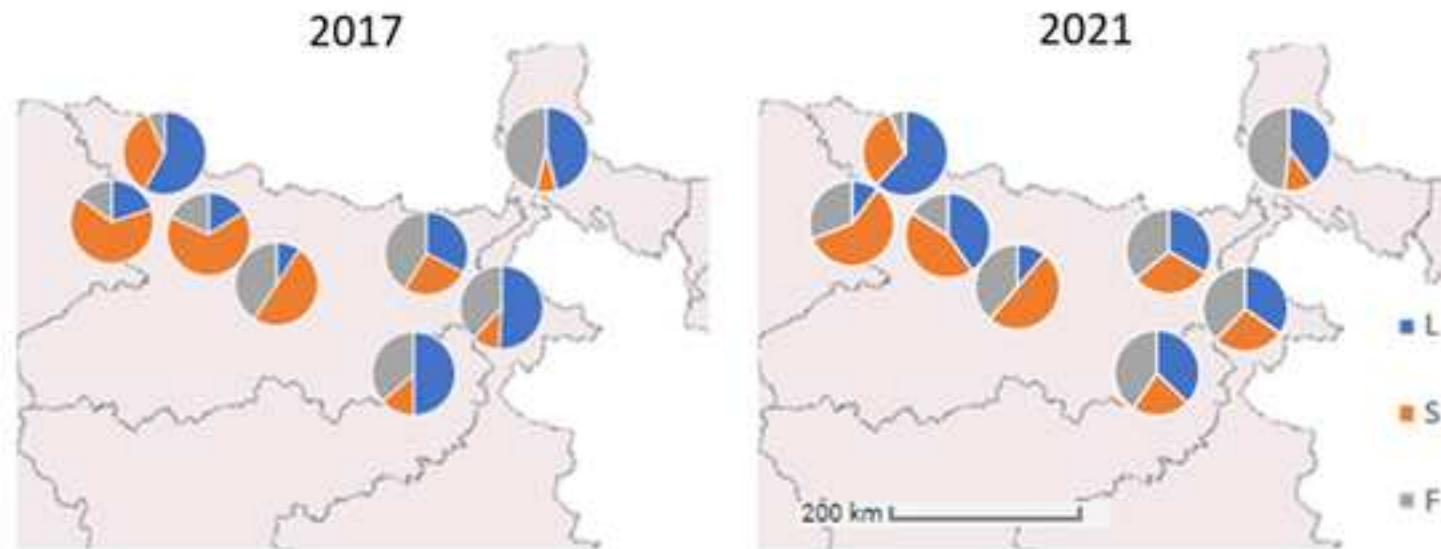

Figure 4 - Map comparisons of 2017 data and 2021 data showing the 1014 alleles.

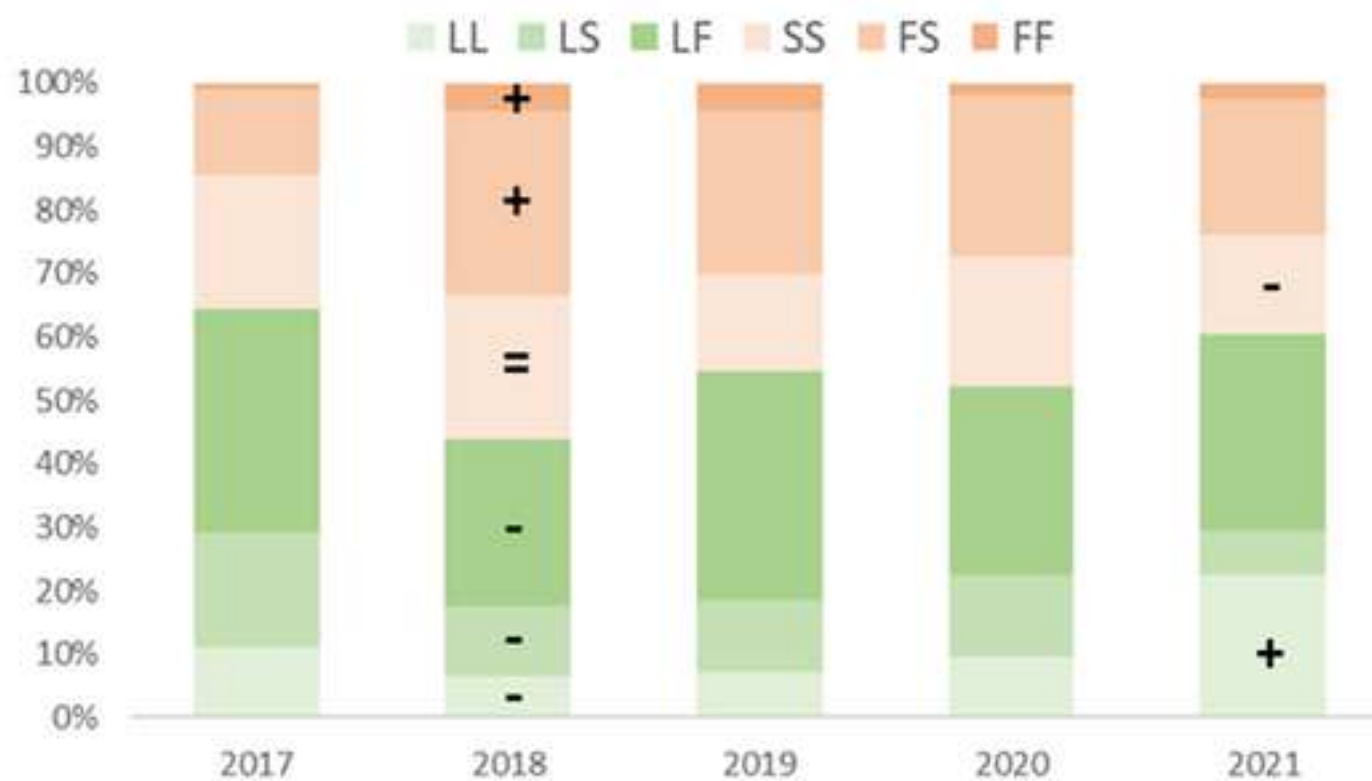

Figure 5. Genotype proportions for the 1014 marker in each sampling year. Comparison with the 2017 reference year is indicated by the +/-/= signs in 2018 (see S1 Table for statistical test results); subsequent years show the same relationship with 2017 unless indicated by a different symbol.



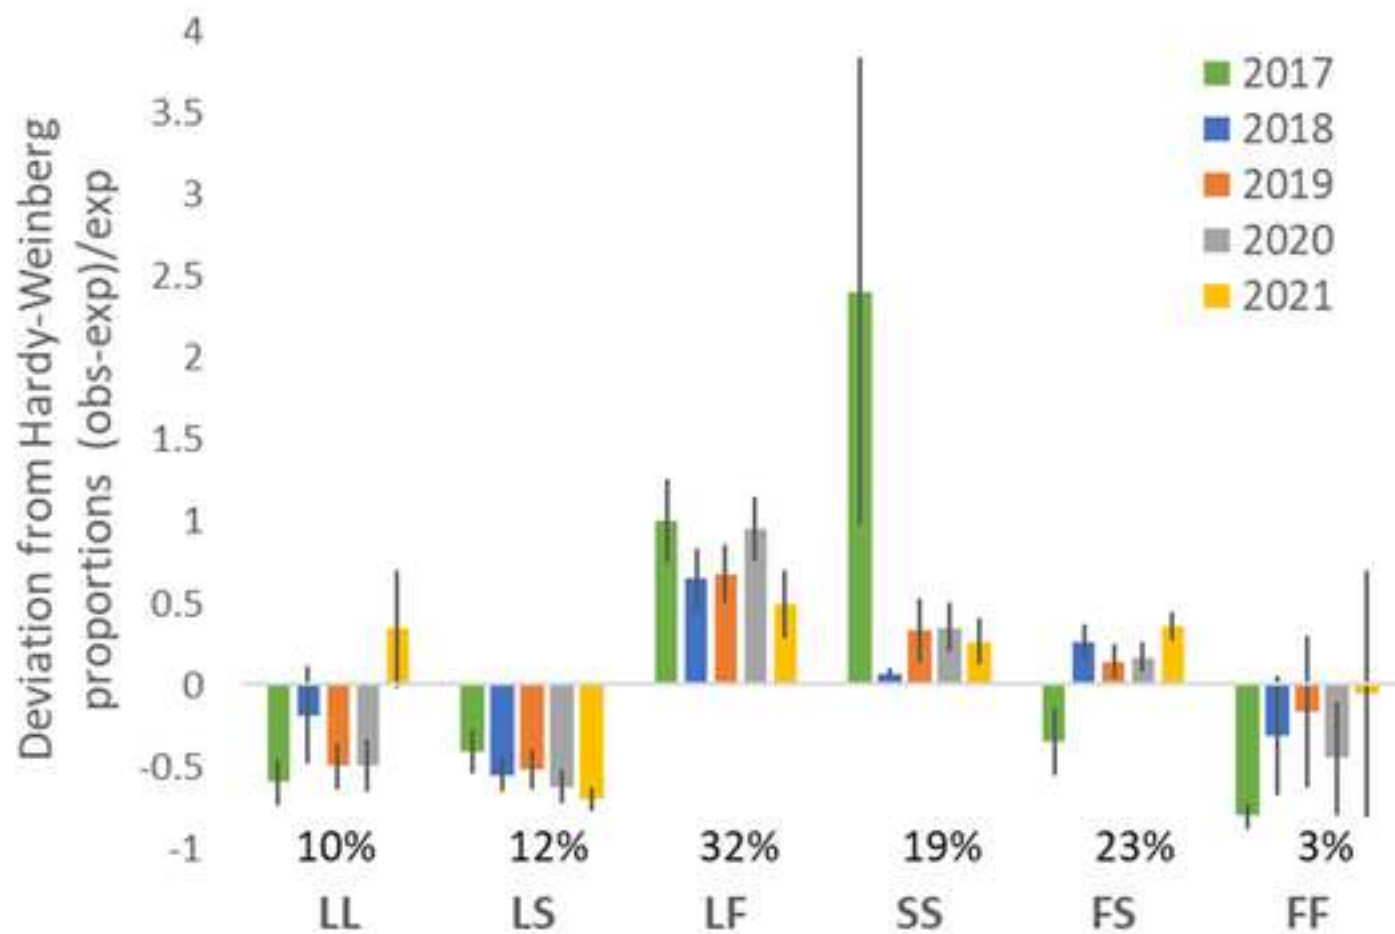

Figure 6. Deviation of each 1014 genotype from Hardy-Weinberg expectations in each year of sampling (mean across districts  $\pm$  standard error). Overall average percentage frequencies of each genotype are shown above genotype labels.

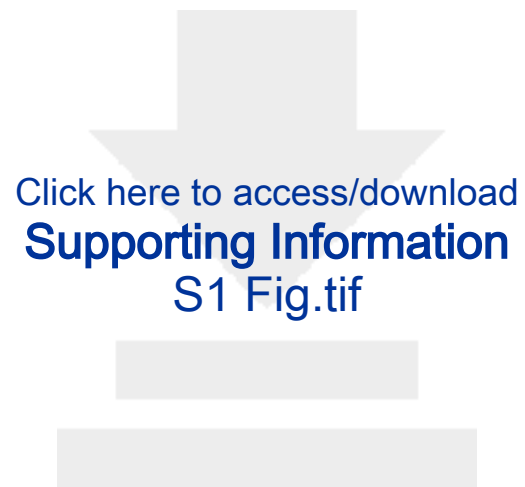

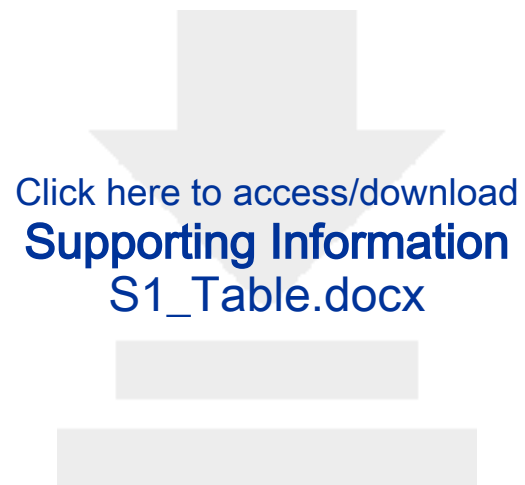

Click here to access/download  
**Supporting Information**  
S1\_Table.docx

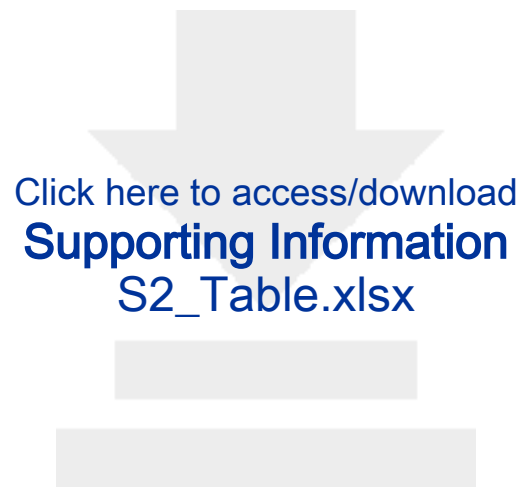

Click here to access/download  
**Supporting Information**  
S2\_Table.xlsx

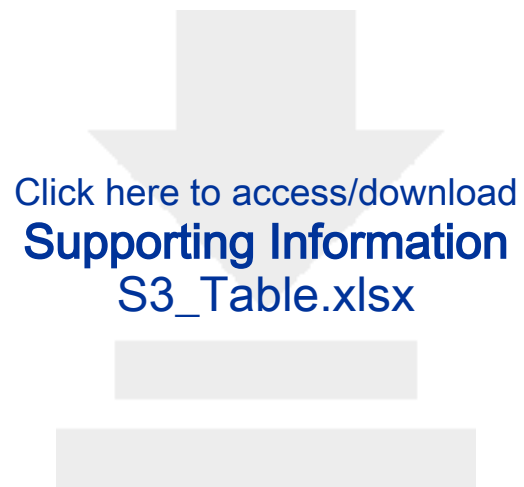

Click here to access/download  
**Supporting Information**  
S3\_Table.xlsx
